# Supplementary material for: Molecular rotation induced giant, anisotropic negative thermal expansion in a hydrogen-bonded coordination framework
Source: Royal Society of Chemistry journal article supplement (doi:10.1039/d2qi02265f), 2023-01-01
Supplement: d2qi02265f1.pdf [file d2qi02265f1.pdf]

# Molecular Rotation induced giant, anisotropic negative thermal expansion in a hydrogen-bonded coordination framework

Peng Meng<sup>1\*</sup>, Aidan Brock<sup>1</sup>, Xiaodong Wang<sup>2</sup>, Yuting Wang<sup>1</sup>, John McMurtrie<sup>1</sup>, Jingsan Xu<sup>1\*</sup>

<sup>1</sup> School of Chemistry and Physics & Centre for Materials Science, Queensland University of Technology, Brisbane, QLD 4000, Australia

<sup>2</sup> Central Analytical Research Facility, Institute for Future Environments, Queensland University of Technology, Brisbane, QLD 4000, Australia

## 1. Materials synthesis, characterization and measurement

**1.1. Materials.** Melamine ( $\geq 99\%$ , Sigma-Aldrich), Cyanuric acid ( $\geq 98\%$ , Sigma-Aldrich), Zinc nitrate ( $\geq 99.5\%$ , Sigma-Aldrich), and ammonia solution (30% in water, Chem-Supply) were used as received without further purification. Ultrapure water was used in all experiments (18.2 M $\Omega$ ·cm, Synergy UV Water Purification System, Merck Millipore). The solutions of melamine (40 mmol/L) and cyanuric acid (40 mmol/L) were prepared under 60 °C. The solutions of Zinc nitrate (100 mmol/L) and aqueous ammonia (10 wt%) were prepared under ambient environment in the laboratory.

**1.2. Preparation of CA-M-Zn crystals.** 4.5 mL cyanuric acid solution (40 mM) were mixed with 2 mL Zn(NO<sub>3</sub>)<sub>2</sub> solution (100 mM) in a 15 mL glass vial, followed by the addition of 3 mL melamine solution (40 mM). The vial was capped and put in a dark closet at room temperature. Transparent crystals started to form within 1 day. The addition of melamine could be in solution or solids, and the initial molar ratio of CA to M could also be random. The outcome of the crystallization is exclusive.

**1.3. Powder X-ray diffraction.** The crystals were first washed by de-ionized water, then rinsed by ethanol at room temperature for quick drying and grinded into powders. The powder X-ray diffraction (PXRD) patterns were obtained on a Rigaku Smartlab with oxford heating-cooling accessory using Cu K $\alpha$  radiation ( $\lambda = 1.5406 \text{ \AA}$ ) working at 40 mA and 40 kV with a resolution of 0.01° (2 $\theta$ ). Cyclic heating/cooling PXRD for lattice refinement were also

performed in the same instrument by sealing crystallites into a quartz capillary, with equilibrium time of 15 minutes at each temperature.

**1.4. PXRD pattern refinement method.** The calculation of PXRD patterns from crystal structures and the comparison with the PXRD patterns were conducted in DIFFRAC.TOPAS v6. Cell parameters from in-situ PXRD patterns were obtained by sequential refinements in DIFFRAC.TOPAS v6 with a Macro written by the third author.

**1.5. Single crystal X-ray structure determination.** A single crystal of CAM-Zn was coated in Paratone N oil and mounted on a nylon loop for collection. SCXRD data for structural determination were collected on Xcalibur, Sapphire3, Gemini ultra ( $\lambda = 1.54184 \text{ \AA}$ ). And in situ SCXRD data were collected on XtaLAB Synergy, Dualflex, Pilatus 300K ( $\lambda = 0.71073 \text{ \AA}$ ). All data were processed in CrysAlis Pro<sup>1</sup>. Structure solutions were obtained using SHELXT<sup>2</sup> and refined using SHELXL<sup>3</sup> implemented within the Olex2 graphical interface<sup>4</sup>. All full-occupancy non-hydrogen models were refined anisotropically, while hydrogen atoms were placed in idealised positions and refined using a riding model on appropriate atoms.

**Table S1.** Crystal data and structure refinement for CA-M-Zn.

|                                             |                                                                                       |
|---------------------------------------------|---------------------------------------------------------------------------------------|
| Identification code                         | CA-M-Zn                                                                               |
| Empirical formula                           | C <sub>15</sub> H <sub>42.34</sub> N <sub>25</sub> O <sub>15.66</sub> Zn <sub>2</sub> |
| Formula weight                              | 954.45                                                                                |
| Temperature/K                               | 173.00(14)                                                                            |
| Crystal system                              | monoclinic                                                                            |
| Space group                                 | P2/c                                                                                  |
| a/Å                                         | 9.5713(2)                                                                             |
| b/Å                                         | 6.93400(10)                                                                           |
| c/Å                                         | 29.0393(5)                                                                            |
| $\alpha$ /°                                 | 90                                                                                    |
| $\beta$ /°                                  | 93.711(2)                                                                             |
| $\gamma$ /°                                 | 90                                                                                    |
| Volume/Å <sup>3</sup>                       | 1923.22(6)                                                                            |
| Z                                           | 2                                                                                     |
| $\rho_{\text{calc}}$ /cm <sup>3</sup>       | 1.648                                                                                 |
| $\mu$ /mm <sup>-1</sup>                     | 2.396                                                                                 |
| F(000)                                      | 985.0                                                                                 |
| Crystal size/mm <sup>3</sup>                | 0.2 × 0.2 × 0.1                                                                       |
| Radiation                                   | Cu K $\alpha$ ( $\lambda$ = 1.54184)                                                  |
| 2 $\theta$ range for data collection/°      | 10.76 to 128.346                                                                      |
| Index ranges                                | -11 ≤ h ≤ 11, -7 ≤ k ≤ 8, -32 ≤ l ≤ 33                                                |
| Reflections collected                       | 18723                                                                                 |
| Independent reflections                     | 3177 R <sub>int</sub> = 0.0275, R <sub>sigma</sub> = 0.0175                           |
| Data/restraints/parameters                  | 3177/2/307                                                                            |
| Goodness-of-fit on F <sup>2</sup>           | 1.122                                                                                 |
| Final R indexes I ≥ 2 $\sigma$ (I)          | R <sub>1</sub> = 0.0337, wR <sub>2</sub> = 0.1012                                     |
| Final R indexes all data                    | R <sub>1</sub> = 0.0347, wR <sub>2</sub> = 0.1022                                     |
| Largest diff. peak/hole / e Å <sup>-3</sup> | 1.15/-0.30                                                                            |

**Table S2.** Variable temperature SCXRD study raw data.

|                                             |                                                              |                                                              |                                                              |                                                              |                                                              |
|---------------------------------------------|--------------------------------------------------------------|--------------------------------------------------------------|--------------------------------------------------------------|--------------------------------------------------------------|--------------------------------------------------------------|
| Temperature/K                               | 150.00(10)                                                   | 200.02(10)                                                   | 250.01(10)                                                   | 280.01(10)                                                   | 290.00(10)                                                   |
| Crystal system                              | monoclinic                                                   | monoclinic                                                   | monoclinic                                                   | monoclinic                                                   | monoclinic                                                   |
| Space group                                 | P2/c                                                         | P2/c                                                         | P2/c                                                         | P2/c                                                         | P2/c                                                         |
| a/Å                                         | 9.5910(3)                                                    | 9.6009(3)                                                    | 9.6144(3)                                                    | 9.6115(4)                                                    | 9.6061(4)                                                    |
| b/Å                                         | 6.9388(2)                                                    | 6.9496(2)                                                    | 6.9595(2)                                                    | 6.9612(3)                                                    | 6.9546(3)                                                    |
| c/Å                                         | 29.0162(8)                                                   | 29.0452(8)                                                   | 29.0893(8)                                                   | 29.1217(9)                                                   | 29.1266(9)                                                   |
| $\alpha$ /°                                 | 90                                                           | 90                                                           | 90                                                           | 90                                                           | 90                                                           |
| $\beta$ /°                                  | 93.547(2)                                                    | 93.638(2)                                                    | 93.720(3)                                                    | 93.780(3)                                                    | 93.692(3)                                                    |
| $\gamma$ /°                                 | 90                                                           | 90                                                           | 90                                                           | 90                                                           | 90                                                           |
| Volume/Å <sup>3</sup>                       | 1927.33(10)                                                  | 1934.06(10)                                                  | 1942.31(10)                                                  | 1944.22(13)                                                  | 1941.81(13)                                                  |
| $\rho_{\text{calc}}$ /g/cm <sup>3</sup>     | 1.673                                                        | 1.667                                                        | 1.660                                                        | 1.658                                                        | 1.660                                                        |
| $\mu$ /mm <sup>-1</sup>                     | 1.933                                                        | 1.927                                                        | 1.918                                                        | 1.917                                                        | 1.919                                                        |
| F(000)                                      | 990.0                                                        | 990.0                                                        | 990.0                                                        | 990.0                                                        | 990.0                                                        |
| 2 $\theta$ range for data collection/°      | 4.954 to 66.918                                              | 4.946 to 66.678                                              | 4.936 to 66.786                                              | 4.932 to 66.758                                              | 4.938 to 66.832                                              |
| Reflections collected                       | 28730                                                        | 29054                                                        | 29162                                                        | 29135                                                        | 29214                                                        |
| Independent reflections                     | 6386 $R_{\text{int}} = 0.0846$ , $R_{\text{sigma}} = 0.0598$ | 6412 $R_{\text{int}} = 0.0825$ , $R_{\text{sigma}} = 0.0578$ | 6451 $R_{\text{int}} = 0.0815$ , $R_{\text{sigma}} = 0.0579$ | 6443 $R_{\text{int}} = 0.0818$ , $R_{\text{sigma}} = 0.0604$ | 6443 $R_{\text{int}} = 0.0905$ , $R_{\text{sigma}} = 0.0639$ |
| Data/restraints/parameters                  | 6386/0/234                                                   | 6412/0/234                                                   | 6451/0/234                                                   | 6443/0/234                                                   | 6443/0/234                                                   |
| Goodness-of-fit on $F^2$                    | 0.860                                                        | 1.096                                                        | 1.091                                                        | 1.115                                                        | 1.113                                                        |
| Final R indexes $I > 2\sigma(I)$            | $R_1 = 0.0591$ , $wR_2 = 0.2053$                             | $R_1 = 0.0564$ , $wR_2 = 0.1448$                             | $R_1 = 0.0551$ , $wR_2 = 0.1472$                             | $R_1 = 0.0584$ , $wR_2 = 0.1597$                             | $R_1 = 0.0642$ , $wR_2 = 0.1808$                             |
| Final R indexes all data                    | $R_1 = 0.0731$ , $wR_2 = 0.2194$                             | $R_1 = 0.0708$ , $wR_2 = 0.1508$                             | $R_1 = 0.0719$ , $wR_2 = 0.1528$                             | $R_1 = 0.0784$ , $wR_2 = 0.1661$                             | $R_1 = 0.0862$ , $wR_2 = 0.1897$                             |
| Largest diff. peak/hole / e Å <sup>-3</sup> | 1.43/-0.54                                                   | 1.55/-0.53                                                   | 1.43/-0.54                                                   | 1.29/-0.51                                                   | 1.48/-0.53                                                   |

|                                             |                                                              |                                                              |                                                              |                                                              |                                                              |
|---------------------------------------------|--------------------------------------------------------------|--------------------------------------------------------------|--------------------------------------------------------------|--------------------------------------------------------------|--------------------------------------------------------------|
| Temperature/K                               | 300.00(10)                                                   | 310.00(10)                                                   | 320.00(10)                                                   | 325.00(10)                                                   | 330.00(10)                                                   |
| Crystal system                              | monoclinic                                                   | monoclinic                                                   | monoclinic                                                   | monoclinic                                                   | monoclinic                                                   |
| Space group                                 | P2/c                                                         | P2/c                                                         | P2/c                                                         | P2/c                                                         | P2/c                                                         |
| a/Å                                         | 9.6002(4)                                                    | 9.5988(4)                                                    | 9.6010(5)                                                    | 9.6114(7)                                                    | 9.6134(7)                                                    |
| b/Å                                         | 6.9504(3)                                                    | 6.9453(3)                                                    | 6.9455(4)                                                    | 6.9454(4)                                                    | 6.9448(4)                                                    |
| c/Å                                         | 29.1051(10)                                                  | 29.0622(11)                                                  | 28.9943(14)                                                  | 28.8982(18)                                                  | 28.8189(17)                                                  |
| $\alpha$ /°                                 | 90                                                           | 90                                                           | 90                                                           | 90                                                           | 90                                                           |
| $\beta$ /°                                  | 93.474(3)                                                    | 93.108(3)                                                    | 92.476(4)                                                    | 91.564(5)                                                    | 90.731(5)                                                    |
| $\gamma$ /°                                 | 90                                                           | 90                                                           | 90                                                           | 90                                                           | 90                                                           |
| Volume/Å <sup>3</sup>                       | 1938.48(13)                                                  | 1934.63(14)                                                  | 1931.64(18)                                                  | 1928.4(2)                                                    | 1923.9(2)                                                    |
| $\rho_{\text{calc}}$ /cm <sup>3</sup>       | 1.663                                                        | 1.667                                                        | 1.669                                                        | 1.672                                                        | 1.676                                                        |
| $\mu$ /mm <sup>-1</sup>                     | 1.922                                                        | 1.926                                                        | 1.929                                                        | 1.932                                                        | 1.937                                                        |
| F(000)                                      | 990.0                                                        | 990.0                                                        | 990.0                                                        | 990.0                                                        | 990.0                                                        |
| 2 $\theta$ range for data collection/°      | 4.948 to 66.946                                              | 4.964 to 66.73                                               | 4.992 to 66.986                                              | 5.028 to 66.722                                              | 5.064 to 66.974                                              |
| Reflections collected                       | 29140                                                        | 29045                                                        | 28736                                                        | 28318                                                        | 28459                                                        |
| Independent reflections                     | 6421 $R_{\text{int}} = 0.1002$ , $R_{\text{sigma}} = 0.0684$ | 6394 $R_{\text{int}} = 0.0985$ , $R_{\text{sigma}} = 0.0722$ | 6402 $R_{\text{int}} = 0.1107$ , $R_{\text{sigma}} = 0.0815$ | 6379 $R_{\text{int}} = 0.1191$ , $R_{\text{sigma}} = 0.0910$ | 6358 $R_{\text{int}} = 0.1227$ , $R_{\text{sigma}} = 0.0900$ |
| Data/restraints/parameters                  | 6421/0/234                                                   | 6394/0/234                                                   | 6402/0/234                                                   | 6379/0/234                                                   | 6358/0/234                                                   |
| Goodness-of-fit on $F^2$                    | 1.122                                                        | 1.069                                                        | 1.074                                                        | 1.066                                                        | 1.038                                                        |
| Final R indexes $ I  \geq 2\sigma(I)$       | $R_1 = 0.0684$ , $wR_2 = 0.1951$                             | $R_1 = 0.0676$ , $wR_2 = 0.1863$                             | $R_1 = 0.0759$ , $wR_2 = 0.2053$                             | $R_1 = 0.0858$ , $wR_2 = 0.2233$                             | $R_1 = 0.0922$ , $wR_2 = 0.2653$                             |
| Final R indexes all data                    | $R_1 = 0.0917$ , $wR_2 = 0.2044$                             | $R_1 = 0.0946$ , $wR_2 = 0.1970$                             | $R_1 = 0.1064$ , $wR_2 = 0.2165$                             | $R_1 = 0.1224$ , $wR_2 = 0.2374$                             | $R_1 = 0.1287$ , $wR_2 = 0.2847$                             |
| Largest diff. peak/hole / e Å <sup>-3</sup> | 1.23/-0.55                                                   | 0.95/-0.72                                                   | 1.14/-0.68                                                   | 0.84/-0.74                                                   | 1.09/-1.29                                                   |

|                                             |                                                              |                                                              |                                                              |                                                              |                                                              |
|---------------------------------------------|--------------------------------------------------------------|--------------------------------------------------------------|--------------------------------------------------------------|--------------------------------------------------------------|--------------------------------------------------------------|
| Temperature/K                               | 335.00(10)                                                   | 340.00(10)                                                   | 345.00(10)                                                   | 350.00(10)                                                   | 355.00(10)                                                   |
| Crystal system                              | monoclinic                                                   | monoclinic                                                   | monoclinic                                                   | monoclinic                                                   | monoclinic                                                   |
| Space group                                 | P2/c                                                         | P2/c                                                         | P2/c                                                         | P2/c                                                         | P2/c                                                         |
| a/Å                                         | 9.6173(5)                                                    | 9.6204(5)                                                    | 9.6162(5)                                                    | 9.6232(5)                                                    | 9.6271(6)                                                    |
| b/Å                                         | 6.9458(3)                                                    | 6.9456(3)                                                    | 6.9418(3)                                                    | 6.9478(3)                                                    | 6.9548(4)                                                    |
| c/Å                                         | 28.7789(12)                                                  | 28.7738(10)                                                  | 28.7773(10)                                                  | 28.8132(10)                                                  | 28.8430(12)                                                  |
| $\alpha$ /°                                 | 90                                                           | 90                                                           | 90                                                           | 90                                                           | 90                                                           |
| $\beta$ /°                                  | 90.232(4)                                                    | 90.034(4)                                                    | 90.116(3)                                                    | 90.030(4)                                                    | 90.156(4)                                                    |
| $\gamma$ /°                                 | 90                                                           | 90                                                           | 90                                                           | 90                                                           | 90                                                           |
| Volume/Å <sup>3</sup>                       | 1922.41(15)                                                  | 1922.65(15)                                                  | 1920.99(15)                                                  | 1926.45(15)                                                  | 1931.16(18)                                                  |
| $\rho_{\text{calc}}$ /g/cm <sup>3</sup>     | 1.677                                                        | 1.677                                                        | 1.678                                                        | 1.674                                                        | 1.670                                                        |
| $\mu$ /mm <sup>-1</sup>                     | 1.938                                                        | 1.938                                                        | 1.940                                                        | 1.934                                                        | 1.930                                                        |
| F(000)                                      | 990.0                                                        | 990.0                                                        | 990.0                                                        | 990.0                                                        | 990.0                                                        |
| 2 $\theta$ range for data collection/°      | 5.086 to 66.866                                              | 5.092 to 66.88                                               | 5.09 to 66.936                                               | 5.09 to 66.91                                                | 5.082 to 66.948                                              |
| Reflections collected                       | 28690                                                        | 28859                                                        | 29022                                                        | 28982                                                        | 28906                                                        |
| Independent reflections                     | 6374 $R_{\text{int}} = 0.1239$ , $R_{\text{sigma}} = 0.0910$ | 6375 $R_{\text{int}} = 0.1194$ , $R_{\text{sigma}} = 0.0875$ | 6389 $R_{\text{int}} = 0.1199$ , $R_{\text{sigma}} = 0.0880$ | 6395 $R_{\text{int}} = 0.1281$ , $R_{\text{sigma}} = 0.0935$ | 6403 $R_{\text{int}} = 0.1263$ , $R_{\text{sigma}} = 0.0954$ |
| Data/restraints/parameters                  | 6374/0/234                                                   | 6375/0/234                                                   | 6389/0/235                                                   | 6395/0/234                                                   | 6403/0/234                                                   |
| Goodness-of-fit on $F^2$                    | 1.070                                                        | 1.050                                                        | 1.028                                                        | 1.037                                                        | 1.004                                                        |
| Final R indexes $ I  \geq 2\sigma(I)$       | $R_1 = 0.0957$ , $wR_2 = 0.2723$                             | $R_1 = 0.0914$ , $wR_2 = 0.2571$                             | $R_1 = 0.0908$ , $wR_2 = 0.2522$                             | $R_1 = 0.0961$ , $wR_2 = 0.2693$                             | $R_1 = 0.0967$ , $wR_2 = 0.2732$                             |
| Final R indexes all data                    | $R_1 = 0.1324$ , $wR_2 = 0.2906$                             | $R_1 = 0.1285$ , $wR_2 = 0.2755$                             | $R_1 = 0.1274$ , $wR_2 = 0.2718$                             | $R_1 = 0.1353$ , $wR_2 = 0.2906$                             | $R_1 = 0.1408$ , $wR_2 = 0.2981$                             |
| Largest diff. peak/hole / e Å <sup>-3</sup> | 1.25/-1.47                                                   | 1.24/-1.45                                                   | 0.93/-1.44                                                   | 1.03/-1.63                                                   | 1.10/-1.65                                                   |

|                                             |                                                              |                                                              |                                                              |                                                              |
|---------------------------------------------|--------------------------------------------------------------|--------------------------------------------------------------|--------------------------------------------------------------|--------------------------------------------------------------|
| Temperature/K                               | 360.00(10)                                                   | 365.00(10)                                                   | 370.00(10)                                                   | 375.00(10)                                                   |
| Crystal system                              | monoclinic                                                   | monoclinic                                                   | monoclinic                                                   | monoclinic                                                   |
| Space group                                 | P2/c                                                         | P2/c                                                         | P2/c                                                         | P2/c                                                         |
| a/Å                                         | 9.6255(6)                                                    | 9.6250(6)                                                    | 9.6281(7)                                                    | 9.6290(7)                                                    |
| b/Å                                         | 6.9592(4)                                                    | 6.9587(4)                                                    | 6.9664(4)                                                    | 6.9689(4)                                                    |
| c/Å                                         | 28.8493(12)                                                  | 28.8587(12)                                                  | 28.8775(14)                                                  | 28.8838(14)                                                  |
| $\alpha$ /°                                 | 90                                                           | 90                                                           | 90                                                           | 90                                                           |
| $\beta$ /°                                  | 90.396(4)                                                    | 90.597(4)                                                    | 90.664(5)                                                    | 90.775(5)                                                    |
| $\gamma$ /°                                 | 90                                                           | 90                                                           | 90                                                           | 90                                                           |
| Volume/Å <sup>3</sup>                       | 1932.45(18)                                                  | 1932.78(18)                                                  | 1936.8(2)                                                    | 1938.0(2)                                                    |
| $\rho_{\text{calc}}$ /cm <sup>3</sup>       | 1.668                                                        | 1.668                                                        | 1.665                                                        | 1.664                                                        |
| $\mu$ /mm <sup>-1</sup>                     | 1.928                                                        | 1.928                                                        | 1.924                                                        | 1.923                                                        |
| F(000)                                      | 990.0                                                        | 990.0                                                        | 990.0                                                        | 990.0                                                        |
| 2 $\theta$ range for data collection/°      | 5.072 to 66.792                                              | 5.064 to 66.832                                              | 5.058 to 66.794                                              | 5.054 to 66.798                                              |
| Reflections collected                       | 28971                                                        | 29104                                                        | 29112                                                        | 29184                                                        |
| Independent reflections                     | 6399 $R_{\text{int}} = 0.1245$ , $R_{\text{sigma}} = 0.0959$ | 6405 $R_{\text{int}} = 0.1272$ , $R_{\text{sigma}} = 0.0958$ | 6417 $R_{\text{int}} = 0.1285$ , $R_{\text{sigma}} = 0.0969$ | 6429 $R_{\text{int}} = 0.1291$ , $R_{\text{sigma}} = 0.0994$ |
| Data/restraints/parameters                  | 6399/0/235                                                   | 6405/0/234                                                   | 6417/0/234                                                   | 6429/0/234                                                   |
| Goodness-of-fit on $F^2$                    | 1.004                                                        | 0.998                                                        | 1.003                                                        | 1.011                                                        |
| Final R indexes $ I  \geq 2\sigma(I)$       | $R_1 = 0.0960$ , $wR_2 = 0.2717$                             | $R_1 = 0.0970$ , $wR_2 = 0.2775$                             | $R_1 = 0.0972$ , $wR_2 = 0.2824$                             | $R_1 = 0.0977$ , $wR_2 = 0.2792$                             |
| Final R indexes all data                    | $R_1 = 0.1404$ , $wR_2 = 0.2953$                             | $R_1 = 0.1428$ , $wR_2 = 0.3032$                             | $R_1 = 0.1458$ , $wR_2 = 0.3086$                             | $R_1 = 0.1487$ , $wR_2 = 0.3069$                             |
| Largest diff. peak/hole / e Å <sup>-3</sup> | 1.02/-1.44                                                   | 1.25/-1.28                                                   | 1.22/-1.16                                                   | 1.28/-1.13                                                   |

Table S3. Numeric data in Figure 2b.

| Compound                                                                                                                                 | $\alpha_v$ ( $10^{-6} \text{ K}^{-1}$ ) | $\Delta T$ | Ref. |
|------------------------------------------------------------------------------------------------------------------------------------------|-----------------------------------------|------------|------|
| Oxides                                                                                                                                   |                                         |            |      |
| ZrW <sub>2</sub> O <sub>8</sub>                                                                                                          | -21.9                                   | 1049.7     | 5    |
| $\alpha$ -HfW <sub>2</sub> O <sub>8</sub>                                                                                                | -26.4                                   | 378        | 6    |
| $\beta$ -HfW <sub>2</sub> O <sub>8</sub>                                                                                                 | -16.5                                   | 92         | 6    |
| $\gamma$ -ZrMo <sub>2</sub> O <sub>8</sub>                                                                                               | -15.0                                   | 562        | 7    |
| $\gamma$ -HfMo <sub>2</sub> O <sub>8</sub>                                                                                               | -12.0                                   | 496        | 8    |
| $\alpha$ -Zr <sub>0.7</sub> Sn <sub>0.3</sub> W <sub>2</sub> O <sub>8</sub>                                                              | -40.6                                   | 100        | 9    |
| $\beta$ -Zr <sub>0.7</sub> Sn <sub>0.3</sub> W <sub>2</sub> O <sub>8</sub>                                                               | -18.7                                   | 450        | 9    |
| $\alpha$ -Zr <sub>0.95</sub> Ti <sub>0.05</sub> W <sub>2</sub> O <sub>8</sub>                                                            | -30.0                                   | 105        | 10   |
| $\beta$ -Zr <sub>0.95</sub> Ti <sub>0.05</sub> W <sub>2</sub> O <sub>8</sub>                                                             | -13.5                                   | 168        | 10   |
| Zr <sub>0.96</sub> Mo <sub>0.04</sub> W <sub>2</sub> O <sub>8-0.02</sub> (M = Eu <sup>3+</sup> , Er <sup>3+</sup> and Yb <sup>3+</sup> ) | -30.9                                   | 70         | 11   |
| ZrW <sub>1.8</sub> V <sub>0.2</sub> O <sub>7.9</sub>                                                                                     | -29.1                                   | 74         | 12   |
| ZrW <sub>1.8</sub> V <sub>0.2</sub> O <sub>7.9</sub>                                                                                     | -4.8                                    | 175        | 12   |
| ZrV <sub>2</sub> O <sub>7</sub>                                                                                                          | -20.1                                   | 498        | 13   |
| ZrV <sub>2</sub> O <sub>7</sub>                                                                                                          | -75.5                                   | 168        | 13   |
| ThP <sub>2</sub> O <sub>7</sub>                                                                                                          | -10.5                                   | 501        | 14   |
| CeP <sub>2</sub> O <sub>7</sub>                                                                                                          | -5.7                                    | 360        | 15   |
| Zr <sub>0.70</sub> V <sub>1.33</sub> Mo <sub>0.67</sub> O <sub>6.73</sub>                                                                | -11.3                                   | 510        | 16   |
| Sc <sub>2</sub> W <sub>3</sub> O <sub>12</sub>                                                                                           | -6.7                                    | 1190       | 17   |
| Dy <sub>2</sub> W <sub>3</sub> O <sub>12</sub>                                                                                           | -26.0                                   | 350        | 18   |
| Y <sub>2</sub> W <sub>3</sub> O <sub>12</sub>                                                                                            | -21.0                                   | 1358       | 19   |
| Er <sub>2</sub> W <sub>3</sub> O <sub>12</sub>                                                                                           | -20.2                                   | 600        | 20   |
| Yb <sub>2</sub> W <sub>3</sub> O <sub>12</sub>                                                                                           | -19.1                                   | 600        | 20   |
| Lu <sub>2</sub> W <sub>3</sub> O <sub>12</sub>                                                                                           | -18.5                                   | 600        | 20   |
| Y <sub>2</sub> Mo <sub>3</sub> O <sub>12</sub>                                                                                           | -37.8                                   | 770        | 21   |
| Er <sub>2</sub> Mo <sub>3</sub> O <sub>12</sub>                                                                                          | -22.7                                   | 775        | 22   |
| Yb <sub>2</sub> Mo <sub>3</sub> O <sub>12</sub>                                                                                          | -18.1                                   | 775        | 22   |
| Lu <sub>2</sub> Mo <sub>3</sub> O <sub>12</sub>                                                                                          | -18.1                                   | 775        | 22   |
| Sc <sub>2</sub> Mo <sub>3</sub> O <sub>12</sub>                                                                                          | -18.9                                   | 775        | 22   |
| NbPO <sub>5</sub>                                                                                                                        | -11.0                                   | 300        | 23   |
| TaPO <sub>5</sub>                                                                                                                        | -1.7                                    | 400        | 23   |
| TaVO <sub>5</sub>                                                                                                                        | -8.9                                    | 580        | 24   |
| TaVO <sub>5</sub>                                                                                                                        | -21.9                                   | 200        | 24   |
| NbVO <sub>5</sub>                                                                                                                        | -6.6                                    | 575        | 25   |
| TaAs <sub>0.1</sub> V <sub>0.9</sub> O <sub>5</sub>                                                                                      | -17.5                                   | 480        | 23   |
| ReO <sub>3</sub>                                                                                                                         | -1.8                                    | 80         | 24   |
| SiO <sub>2</sub> ( $\beta$ -cristobalite)                                                                                                | -6.9                                    | 548        | 25   |
| Cu <sub>2</sub> O                                                                                                                        | -7.2                                    | 231        | 26   |
| Ag <sub>2</sub> O                                                                                                                        | -21                                     | 145        | 27   |
| Ag <sub>2</sub> O                                                                                                                        | -27.1                                   | 173        | 26   |
| AlPO <sub>4</sub> -17                                                                                                                    | -35.1                                   | 282        | 28   |
| H-ZSM-5                                                                                                                                  | -27                                     | 800        | 29   |
| Zn <sub>2</sub> V <sub>2</sub> O <sub>7</sub>                                                                                            | -17.9                                   | 300        | 30   |
| $\alpha$ -Cu <sub>2</sub> V <sub>2</sub> O <sub>7</sub>                                                                                  | -10.2                                   | 375        | 31   |
| Fluorides                                                                                                                                |                                         |            |      |
| CaZrF <sub>6</sub>                                                                                                                       | -26.5                                   | 1163       | 32   |
| MnZrF <sub>6</sub>                                                                                                                       | -13.4                                   | 373        | 33   |
| FeZrF <sub>6</sub>                                                                                                                       | -9.7                                    | 373        | 33   |



|                                                                                  |        |       |    |
|----------------------------------------------------------------------------------|--------|-------|----|
| MgZrF <sub>6</sub>                                                               | -2.4   | 373   | 34 |
| CaHfF <sub>6</sub>                                                               | -45.3  | 288   | 32 |
| CaNbF <sub>6</sub>                                                               | -36.5  | 775   | 35 |
| TiZrF <sub>6</sub>                                                               | -6.1   | 323   | 36 |
| YbZrF <sub>7</sub>                                                               | -6.0   | 132   | 37 |
| Cyanides                                                                         |        |       |    |
| Zn(CN) <sub>2</sub>                                                              | -50.7  | 350   | 38 |
| Cd(CN) <sub>2</sub> (double-network)                                             | -61.2  | 225   | 38 |
| Cd(CN) <sub>2</sub> (single-network)                                             | -100   | 225   | 39 |
| Zn[Ag(CN) <sub>2</sub> ] <sub>2</sub>                                            | -13.6  | 275   | 40 |
| AgB(CN) <sub>4</sub>                                                             | -40.0  | 500   | 41 |
| CuB(CN) <sub>4</sub>                                                             | -9.2   | 300   | 41 |
| YFe(CN) <sub>6</sub>                                                             | -33.7  | 225   | 42 |
| FeCo(CN) <sub>6</sub>                                                            | -4.4   | 295.8 | 43 |
| GaFe(CN) <sub>6</sub>                                                            | -11.9  | 375   | 44 |
| FeFe(CN) <sub>6</sub>                                                            | -12.8  | 350   | 45 |
| ScCo(CN) <sub>6</sub>                                                            | -19.8  | 575   | 46 |
| TiCo(CN) <sub>6</sub>                                                            | -12.2  | 375   | 47 |
| LaCo(CN) <sub>6</sub>                                                            | -43.9  | 400   | 48 |
| SmCo(CN) <sub>6</sub>                                                            | -37.4  | 400   | 48 |
| HoCo(CN) <sub>6</sub>                                                            | -30.2  | 400   | 48 |
| LuCo(CN) <sub>6</sub>                                                            | -27.2  | 400   | 48 |
| YCo(CN) <sub>6</sub>                                                             | -31.6  | 400   | 48 |
| ErCo(CN) <sub>6</sub>                                                            | -27.0  | 275   | 49 |
| CsCd[Fe(CN) <sub>6</sub> ]·0.5H <sub>2</sub> O                                   | -26.4  | 200   | 50 |
| Cs <sub>0.7</sub> Ni[Fe(CN) <sub>6</sub> ] <sub>0.9</sub> ·2.9H <sub>2</sub> O   | -1.2   | 200   | 50 |
| Cs <sub>0.97</sub> Cu[Fe(CN) <sub>6</sub> ] <sub>0.99</sub> ·1.1H <sub>2</sub> O | -6.3   | 200   | 50 |
| Cs <sub>0.91</sub> Ni[Fe(CN) <sub>6</sub> ] <sub>0.97</sub> ·0.4H <sub>2</sub>   | -12.3  | 200   | 50 |
| Rb <sub>0.78</sub> Fe[Fe(CN) <sub>6</sub> ] <sub>0.83</sub> ·2.8H <sub>2</sub> O | -6.3   | 200   | 50 |
| Rb <sub>0.64</sub> Zn[Fe(CN) <sub>6</sub> ] <sub>0.88</sub> ·2.3H <sub>2</sub> O | -17.7  | 200   | 50 |
| CdPt(CN) <sub>6</sub>                                                            | -30.1  | 140   | 51 |
| MnPt(CN) <sub>6</sub>                                                            | -19.7  | 200   | 51 |
| FePt(CN) <sub>6</sub>                                                            | -12.0  | 215   | 51 |
| CoPt(CN) <sub>6</sub>                                                            | -4.8   | 250   | 51 |
| NiPt(CN) <sub>6</sub>                                                            | -3.1   | 230   | 51 |
| ZnPt(CN) <sub>6</sub>                                                            | -10.6  | 300   | 51 |
| Mn <sub>3</sub> Co(CN) <sub>6</sub> ] <sub>2</sub> ·12H <sub>2</sub> O           | -87.6  | 175   | 52 |
| Fe <sub>3</sub> Co(CN) <sub>6</sub> ] <sub>2</sub> ·12H <sub>2</sub> O           | -58.8  | 175   | 52 |
| Co <sub>3</sub> Co(CN) <sub>6</sub> ] <sub>2</sub> ·12H <sub>2</sub> O           | -119.1 | 175   | 52 |
| Ni <sub>3</sub> Co(CN) <sub>6</sub> ] <sub>2</sub> ·12H <sub>2</sub> O           | -83.0  | 175   | 52 |
| Cu <sub>3</sub> Co(CN) <sub>6</sub> ] <sub>2</sub> ·12H <sub>2</sub> O           | -58.7  | 175   | 52 |
| Zn <sub>3</sub> Co(CN) <sub>6</sub> ] <sub>2</sub> ·12H <sub>2</sub> O           | -89.1  | 175   | 52 |
| Fe <sub>3</sub> Fe(CN) <sub>6</sub> ] <sub>2</sub> ·16H <sub>2</sub> O           | -29.7  | 175   | 52 |
| Cu <sub>3</sub> Fe(CN) <sub>6</sub> ] <sub>2</sub> ·16H <sub>2</sub> O           | -59.7  | 175   | 52 |
| Zn <sub>3</sub> Fe(CN) <sub>6</sub> ] <sub>2</sub> ·16H <sub>2</sub> O           | -118.8 | 175   | 52 |
| MOFs                                                                             |        |       |    |
| MOF-5                                                                            | -39.3  | 420   | 53 |
| HKUST-1                                                                          | -12.3  | 420   | 54 |
| UiO-66(Zr)                                                                       | -97    | 180   | 55 |

|                                                                              |       |     |    |
|------------------------------------------------------------------------------|-------|-----|----|
| MIL-68(In)                                                                   | -12.3 | 475 | 56 |
| Zn <sub>8</sub> (SiO <sub>4</sub> )(m-BDC) <sub>6</sub>                      | -4.4  | 375 | 57 |
| Cu-TDPAT                                                                     | -19.7 | 400 | 58 |
| M <sub>2</sub> C <sub>4</sub> O <sub>4</sub> ·2H <sub>2</sub> O (M = Zn, Cd) | -13.9 | 250 | 59 |

---

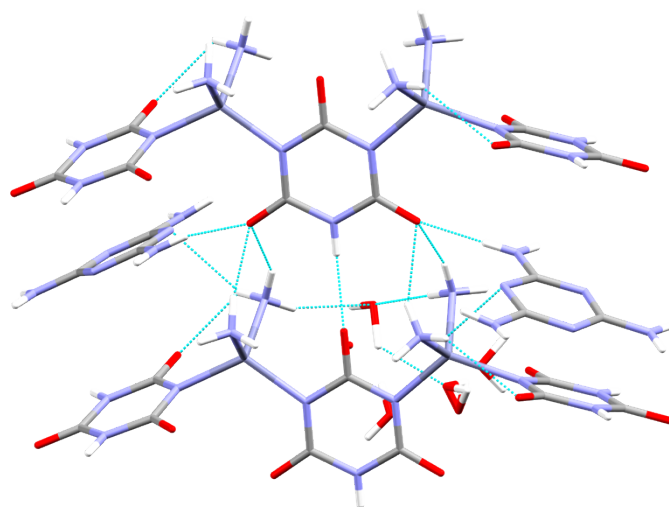

**Figure S1.** Auxiliary H-bonds between NH<sub>3</sub> and M(CA).

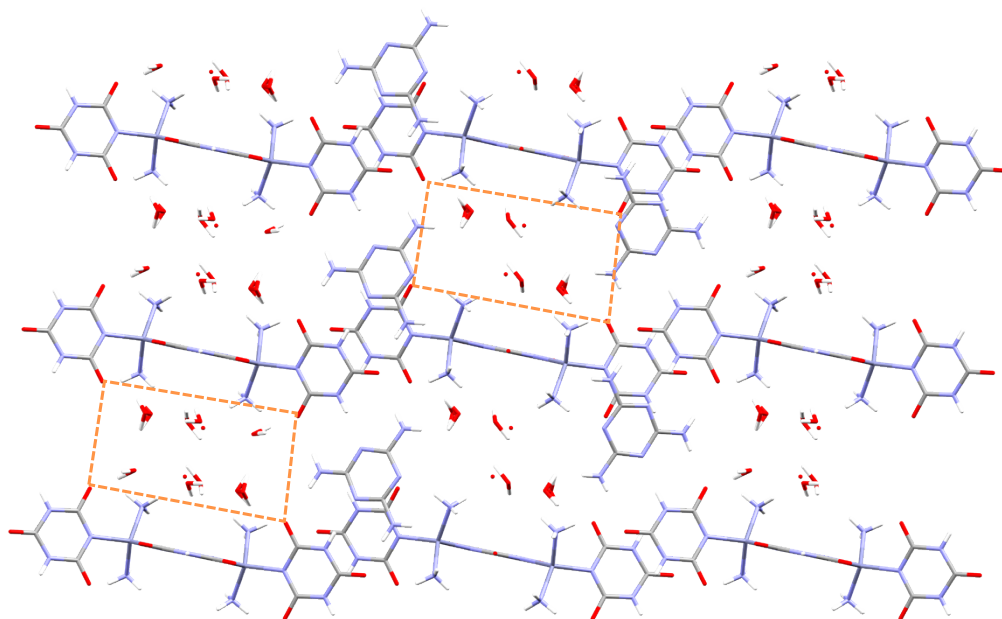

**Figure S2.** Water molecules filling the 1D channels.

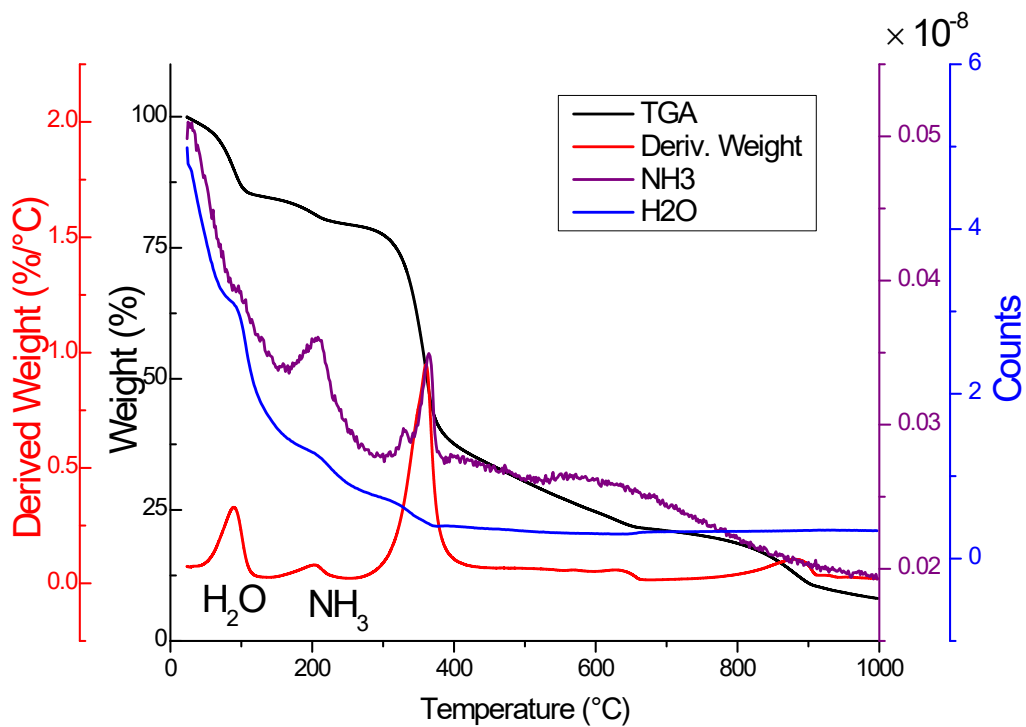

Figure S3. TGA-MS result of CAM-Zn crystal.

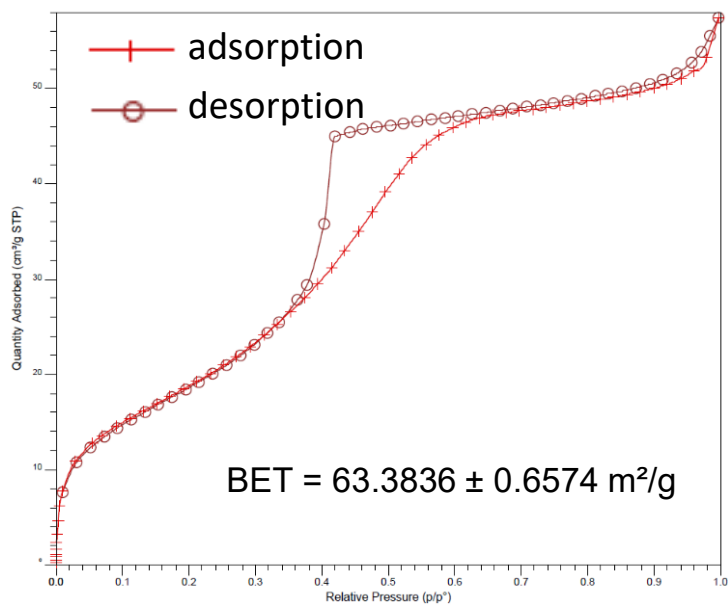

Figure S4. N<sub>2</sub> Adsorption/desorption curves. Degas temperature: 105 °C.

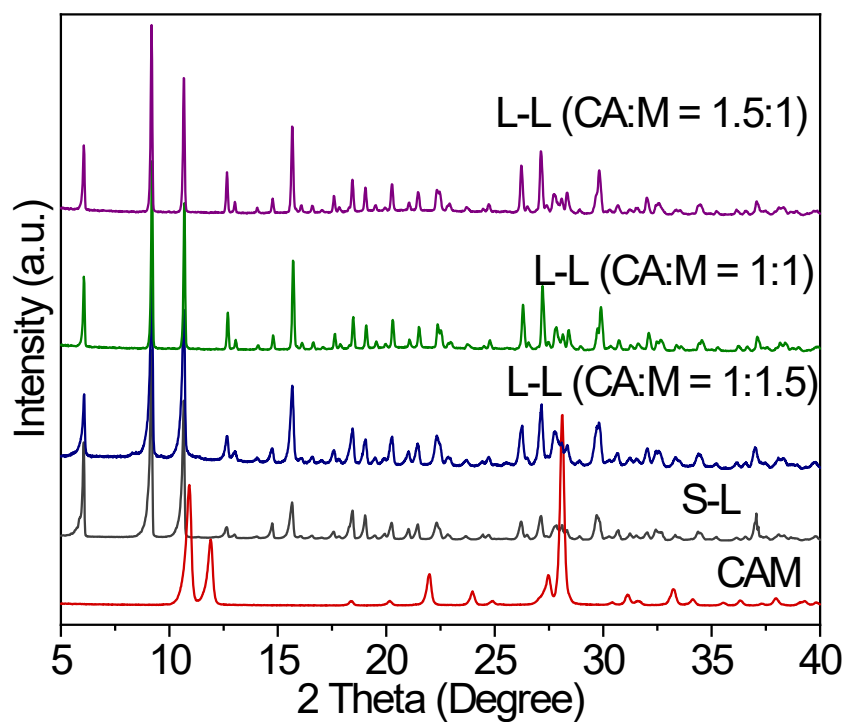

**Figure S5.** PXRD patterns of crystals obtained at different conditions. L-L means all reactants were in solutions state at the commencement of reaction; following is the molar ratio of CA:M. S-L means that the M added in the reaction system was particles (without dissolved) and CA was in solution state (the amount of M do not affect the outcome).

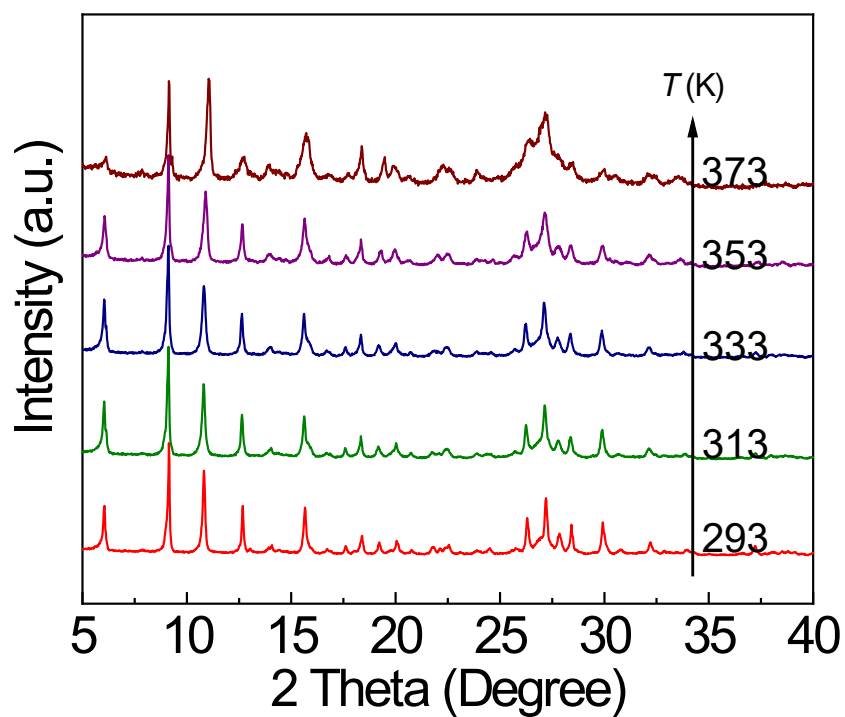

**Figure S6.** PXRD patterns at varied temperatures.

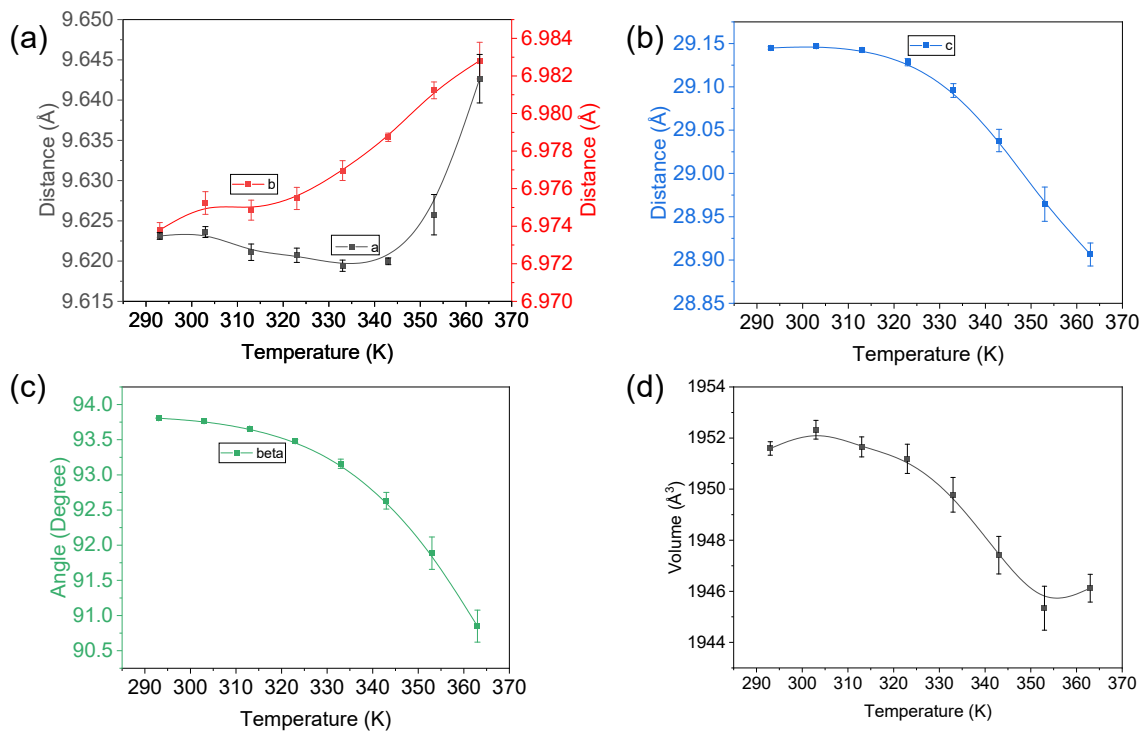

**Figure S7.** unit cell parameters refined from in-situ PXRD patterns: (a) *a* and *b* axis, (b) *c* axis, (c) beta angle, (d) volume change.

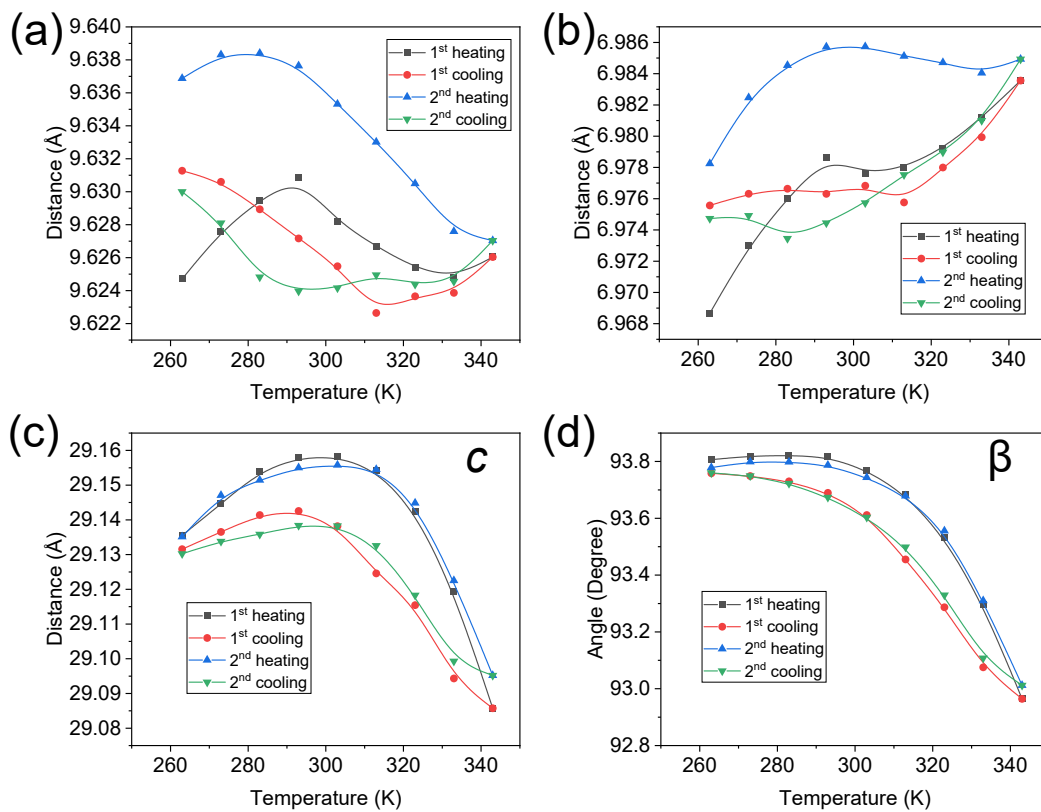

**Figure S8.** the length change of (a) *a* axis, (b) *b* axis, (c) *c* axis, (d)  $\beta$  angle upon cyclic heating/cooling.

**Figure S9.** illustration of  $\theta_2$  and  $\omega_2$  rotations of CA02 with respect to Zn.

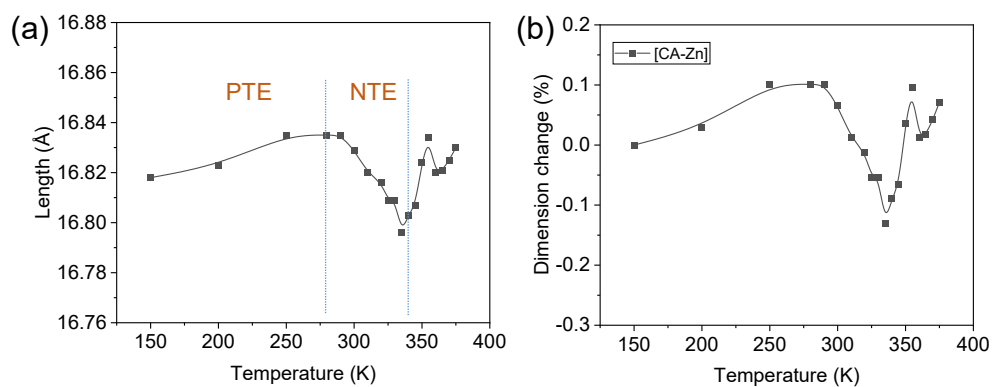

**Figure S10.** (a) Length change of coordination subunits CA-Zn-CA-Zn-CA with respect to temperature (measured between the two farthest oxygen atoms) and (b) the corresponding dimension change.

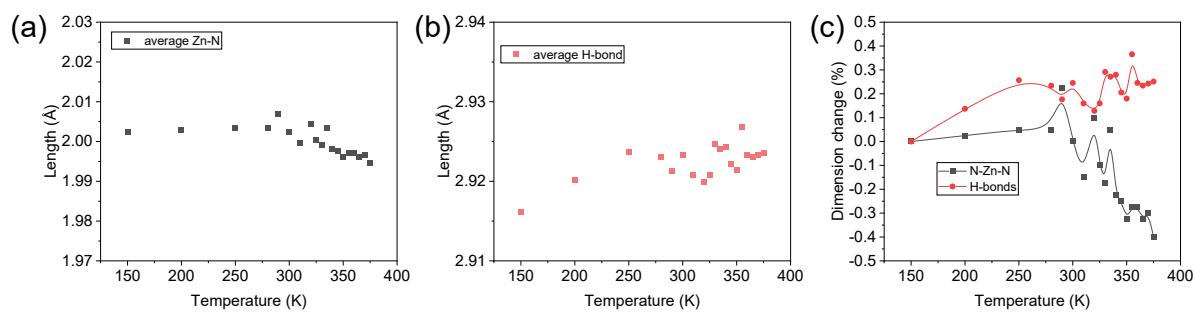

**Figure S11.** (a) Average length of Zn-N(CA) bonds, (b) average length of triple H-bonds between M-CA01, (c) the corresponding dimension change.



## Reference

1. Diffraction, R. O. CrysAlis Pro, 40\_64.53a; Rigaku Oxford Diffraction: 2019.
2. Sheldrick, G. M., SHELXT - Integrated space-group and crystal-structure determination. *Acta Crystallographica a-Foundation and Advances* 2015, 71, 3-8.
3. Sheldrick, G. M., A short history of SHELX. *Acta Crystallographica Section A* 2008, 64, 112-122.
4. Dolomanov, O. V.; Bourhis, L. J.; Gildea, R. J.; Howard, J. A. K.; Puschmann, H., OLEX2: a complete structure solution, refinement and analysis program. *Journal of Applied Crystallography* 2009, 42, 339-341.
5. T. Mary, J. Evans, T. Vogt, A. Sleight, *Science* 272 (1996) 90–92.
6. Y. Yamamura, N. Nakajima, T. Tsuji, *Phys. Rev. B* 64 (2001) 184109.
7. C. Lind, A.P. Wilkinson, Z. Hu, S. Short, J.D. Jorgensen, *Chem. Mater.* 10 (1998) 2335–2337.
8. C. Lind, Negative thermal expansion materials related to cubic zirconium tungstate, Georgia Institute of Technology, 2001.
9. C. De Meyer, F. Bouree, J.S. Evans, K. De Buysser, E. Bruneel, I. Van Driessche, S. Hoste, *J. Mater. Chem.* 14 (2004) 2988–2994.
10. K. De Buysser, I. Van Driessche, B.V. Putte, J. Schaubroeck, S. Hoste, *J. Solid State Chem.* 180 (2007) 2310–2315.
11. H.H. Li, J.S. Han, H. Ma, L. Huang, X.H. Zhao, *J. Solid State Chem.* 180 (2007) 852–857.
12. X. Chen, F. Guo, X. Deng, J. Tao, H. Ma, X. Zhao, *J. Alloys Compd.* 537 (2012) 227–231.
13. R. Withers, J. Evans, J. Hanson, A. Sleight, *J. Solid State Chem. France* 137 (1998) 161–167.
14. G. Wallez, P.E. Raison, N. Dacheux, N. Clavier, D. Bykov, L. Delevoye, K. Popa, D. Bregiroux, A.N. Fitch, R.J. Konings, *Inorg. Chem.* 51 (2012) 4314–4322.
15. K. White, P.L. Lee, P.J. Chupas, K. Chapman, E.A. Payzant, A.C. Jupe, W. Bassett, C.S. Zha, A.P. Wilkinson, *Chem. Mater.* 20 (2008) 3728–3734.
16. M. Zhang, Y. Mao, J. Guo, W. Zhou, M. Chao, N. Zhang, M. Yang, X. Kong, X. Kong, E. Liang, *RSC Adv.* 7 (2017) 3934–3940.
17. T. Mary, A. Sleight, *J. Mater. Res.* 14 (1999) 912–915.
18. W. Cao, Q. Li, K. Lin, Z. Liu, J. Deng, J. Chen, X. Xing, *RSC Adv.* 6 (2016) 96275– 96280.
19. P. Forster, A. Sleight, *Int. J. Inorg. Mater.* 1 (1999) 123–127.
20. S. Sumithra, A. Tyagi, A. Umarji, *Mater. Sci. Eng., B* 116 (2005) 14–18.
21. B. Marinkovic, P. Jardim, R. De Avillez, F. Rizzo, *Solid State Sci.* 7 (2005) 1377– 1383.
22. S. Sumithra, A. Umarji, *Solid State Sci.* 8 (2006) 1453–1458.
23. T.G. Amos, Negative thermal expansion in AOMO<sub>4</sub> compounds, Oregon State University, 2000.
24. X. Wang, Q. Huang, J. Deng, R. Yu, J. Chen, X. Xing, *Inorg. Chem.* 50 (2011) 2685–2690.
25. J. Wang, J. Deng, R. Yu, J. Chen, X. Xing, *Dalton Trans.* 40 (2011) 3394–3397.
26. W. Tiano, M. Dapiaggi, G. Artioli, *J. Appl. Crystallogr.* 36 (2003) 1461–1463.
27. B.J. Kennedy, Y. Kubota, K. Kato, *Solid State Commun.* 136 (2005) 177–180.
28. M.P. Attfield, A.W. Sleight, *Chem. Mater.* 10 (1998) 2013–2019.
29. B. Marinkovic, P. Jardim, A. Saavedra, L. Lau, C. Baehtz, R. De Avillez, F. Rizzo, *Micropor. Mesopor. Mat.* 71 (2004) 117–124.

30. M. Rotermel, T. Krasnenko, *Crystallogra. Rep.* 62 (2017) 703–709.
31. N. Shi, A. Sanson, A. Venier, L. Fan, C. Sun, X. Xing, J. Chen, *Chem. Comm.* 56 (2020) 10666–10669.
32. J.C. Hancock, K.W. Chapman, G.J. Halder, C.R. Morelock, B.S. Kaplan, L.C. Gallington, A. Bongiorno, C. Han, S. Zhou, A.P. Wilkinson, *Chem. Mater.* 27 (2015) 3912–3918.
33. L. Hu, J. Chen, J. Xu, N. Wang, F. Han, Y. Ren, Z. Pan, Y. Rong, R. Huang, J. Deng, *J. Am. Chem. Soc.* 138 (2016) 14530–14533.
34. J. Xu, L. Hu, Y. Song, F. Han, Y. Qiao, J. Deng, J. Chen, X. Xing, *J. Am. Ceram. Soc.* 100 (2017) 5385–5388.
35. B.R. Hester, J.C. Hancock, S.H. Lapidus, A.P. Wilkinson, *Chem. Mater.* 29 (2017) 823–831.
36. C. Yang, Y. Zhang, J. Bai, B. Qu, P. Tong, M. Wang, J. Lin, R. Zhang, H. Tong, Y. Wu, *J. Mater. Chem. C* 6 (2018) 5148–5152.
37. J.O. Ticknor, B.R. Hester, J.W. Adkins, W. Xu, A.A. Yakovenko, A.P. Wilkinson, *Chem. Mater.* 30 (2018) 3071–3077.
38. A.L. Goodwin, C.J. Kepert, *Phys. Rev. B* 71 (2005) 140301.
39. A.E. Phillips, A.L. Goodwin, G.J. Halder, P.D. Southon, C.J. Kepert, *Angew. Chem. Int. Ed.* 47 (2008) 1396–1399.
40. A.L. Goodwin, B.J. Kennedy, C.J. Kepert, *J. Am. Chem. Soc.* 131 (2009) 6334–6335.
41. Q. Gao, J. Wang, A. Sanson, Q. Sun, E. Liang, X. Xing, J. Chen, *J. Am. Chem. Soc.* 142 (2020) 6935–6939.
42. Q. Gao, J. Chen, Q. Sun, D. Chang, Q. Huang, H. Wu, A. Sanson, R. Milazzo, H. Zhu, Q. Li, *Angew. Chem. Int. Ed.* 56 (2017) 9023–9028.
43. S. Margadonna, K. Prassides, A.N. Fitch, *J. Am. Chem. Soc.* 126 (2004) 15390–15391.
44. Q. Gao, N. Shi, Q. Sun, A. Sanson, R. Milazzo, A. Carnera, H. Zhu, S.H. Lapidus, Y. Ren, Q. Huang, *Inorg. Chem.* 57 (2018) 10918–10924.
45. N. Shi, Q. Gao, A. Sanson, Q. Li, L. Fan, Y. Ren, L. Olivi, J. Chen, X. Xing, *Dalton Trans.* 48 (2019) 3658–3663.
46. Q. Gao, Y. Sun, N. Shi, R. Milazzo, S. Pollastri, L. Olivi, Q. Huang, H. Liu, A. Sanson, Q. Sun, *Scr. Mater.* 187 (2020) 119–124.
47. Y. Li, Q. Gao, D. Chang, P. Sun, J. Liu, Y. Jia, E. Liang, Q. Sun, *J. Phys. Condens. Mat.* 32 (2020) 455703.
48. S.G. Duyker, V.K. Peterson, G.J. Kearley, A.J. Ramirez-Cuesta, C.J. Kepert, *Angew. Chem. Int. Ed.* 52 (2013) 5266–5270.
49. T. Pretsche, K.W. Chapman, G.J. Halder, C.J. Kepert, *Chem. Comm.* (2006) 1857–1859.
50. T. Matsuda, J. Kim, K. Ohoyama, Y. Moritomo, *Phys. Rev. B* 79 (2009) 172302.
51. K.W. Chapman, P.J. Chupas, C.J. Kepert, *J. Am. Chem. Soc.* 128 (2006) 7009–7014.
52. S. Adak, L.L. Daemen, M. Hartl, D. Williams, J. Summerhill, H. Nakotte, *J. Solid State Chem.* 184 (2011) 2854–2861.
53. N. Lock, Y. Wu, M. Christensen, L.J. Cameron, V.K. Peterson, A.J. Bridgeman, C.J. Kepert, B.B. Iversen, *J. Phys. Chem. C* 114 (2010) 16181–16186.

54. Y. Wu, A. Kobayashi, G.J. Halder, V.K. Peterson, K.W. Chapman, N. Lock, P.D. Southon, C.J. Kepert, *Angew. Chem. Int. Ed.* 47 (2008) 8929–8932.
55. M.J. Cliffe, J.A. Hill, C.A. Murray, F.X. Coudert, A.L. Goodwin, *Phys. Chem. Chem. Phys.* 17 (2015) 11586–11592.
56. Z. Liu, Q. Li, H. Zhu, K. Lin, J. Deng, J. Chen, X. Xing, *Chem. Comm.* 54 (2018) 5712–5715.
57. Z. Liu, X. Jiang, C. Wang, C. Liu, Z. Lin, J. Deng, J. Chen, X. Xing, *Inorg. Chem. Front.* 6 (2019) 1675–1679.
58. M. Asgari, I. Kochetygov, H. Abedini, W.L. Queen, *Nano Res.* (2020) 1–7.
59. Z. Liu, R. Ma, J. Deng, J. Chen, X. Xing, *Chem. Mater.* 32 (2020) 2893–2898.
